# Supplementary material for: Structure Controlling Factors of Oxido-Bridged Dinuclear Iron(III) Complexes
Source: MDPI journal article supplement (doi:10.3390/molecules26040897), 2021-02-08
Supplement: s1 [file s1]

## Supplementary Materials

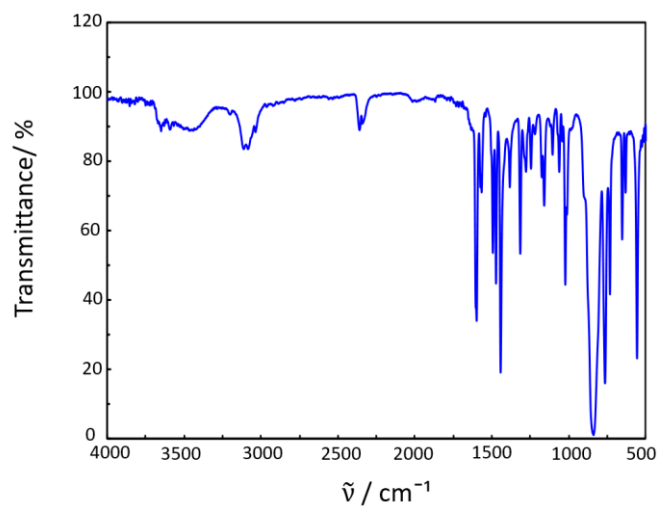

**Figure S1.** IR spectra of 1.

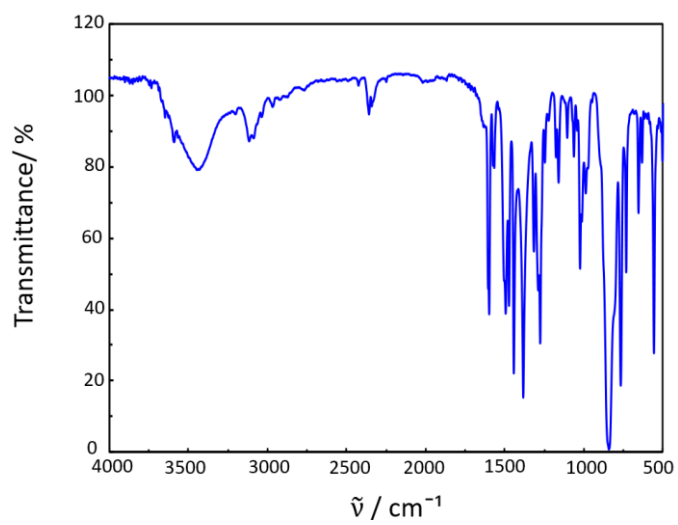

**Figure S2.** IR spectra of 2.

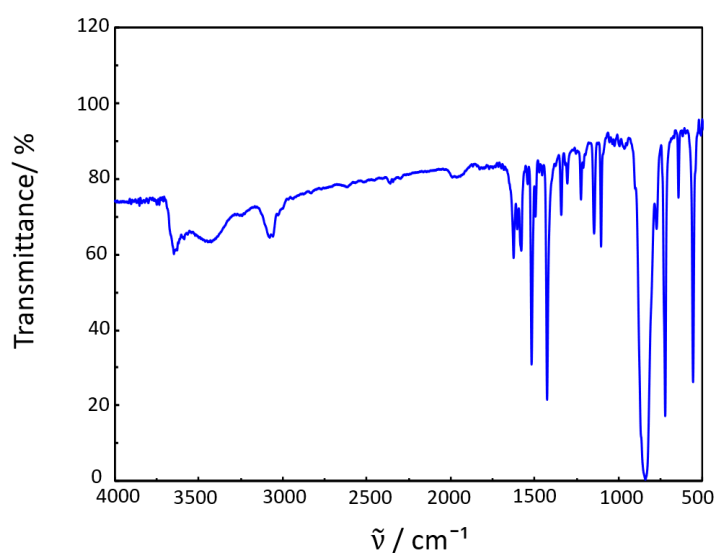

**Figure S3.** IR spectra of 3.

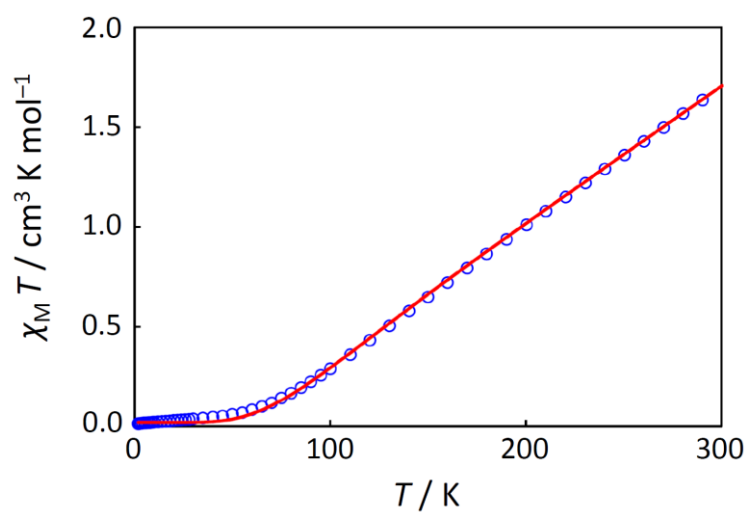

**Figure S4.** The  $\chi_M T$  versus  $T$  plot for 2. The observed data (○) and the theoretical curve (—).

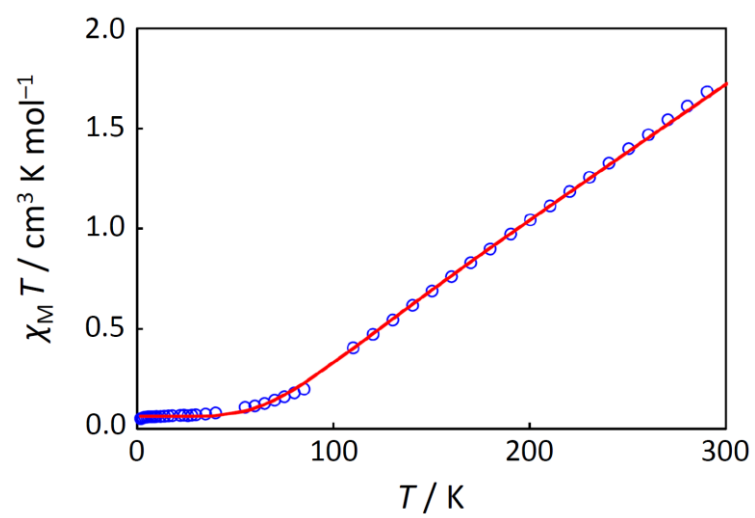

**Figure S5.** The  $\chi_M T$  versus  $T$  plot for **3** The observed data (○) and the theoretical curve (—).
